# Supplementary material for: A Multivariate Analysis of Genetic Constraints to Life History Evolution in a Wild Population of Red Deer
Source: PubMed Central journal article supplement (PMC4256783; doi:10.1534/genetics.114.164319), 2014-10-02
Supplement: 0ccc6c8c8bd2a9c54f14e79738466e60_genetics.114.164319-2.pdf [file 0ccc6c8c8bd2a9c54f14e79738466e60_genetics.114.164319-2.pdf]

**Table S3 Model showing variances (diagonal), covariances (below diagonal) and correlations (above diagonal) ( $\pm 1SE$ ) for the minimal models of life history traits in both sexes.** Genetic parameters do not have associated significances or standard errors as they are calculated from a fourth order FA model (see Methods). Underlined values highlight between-sex covariances and correlations. Non-genetic matrices were estimated as variance-correlation matrices and thus there are no standard errors on covariances. The permanent environment/residual section of the table presents permanent environment (PE) variances in the upper row and residual variances in the lower row. AFR is multiplied by -1 to make any trade-offs negative in sign.

| <b>Genetic</b> | Female SBA     | Female AFR      | Female L      | Female ABS     | Male SBA     | Male AFR       | Male L         | Male ABS       |
|----------------|----------------|-----------------|---------------|----------------|--------------|----------------|----------------|----------------|
| Female SBA     | 0.187          | 0.294           | 0.00844       | -0.221         | <u>0.516</u> | <u>-0.138</u>  | <u>-0.0639</u> | <u>0.0927</u>  |
| Female AFR     | 0.0521         | 0.167           | -0.368        | 0.829          | <u>0.408</u> | <u>-0.0658</u> | <u>-0.350</u>  | <u>-0.0668</u> |
| Female L       | 0.00108        | -0.0443         | 0.0868        | -0.510         | <u>0.419</u> | <u>0.844</u>   | <u>0.622</u>   | <u>0.925</u>   |
| Female ABS     | -0.0206        | 0.0730          | -0.0323       | 0.0464         | <u>0.180</u> | <u>-0.226</u>  | <u>-0.220</u>  | <u>-0.21</u>   |
| Male SBA       | <u>0.0572</u>  | <u>0.0426</u>   | <u>0.0316</u> | <u>0.00993</u> | 0.0655       | 0.197          | 0.625          | 0.703          |
| Male AFR       | <u>-0.0482</u> | <u>-0.0216</u>  | <u>0.200</u>  | <u>-0.0392</u> | 0.0405       | 0.648          | 0.190          | 0.765          |
| Male L         | <u>-0.0118</u> | <u>-0.0608</u>  | <u>0.0781</u> | <u>-0.0202</u> | 0.0682       | 0.0650         | 0.181          | 0.722          |
| Male ABS       | <u>0.0101</u>  | <u>-0.00684</u> | <u>0.0683</u> | <u>-0.0113</u> | 0.0451       | 0.154          | 0.0772         | 0.0629         |

  

| <b>Permanent env/<br/>Residual</b> | Female SBA                        | Female AFR                        | Female L                          | Female ABS                          | Male SBA | Male AFR                          | Male L                            | Male ABS                          |
|------------------------------------|-----------------------------------|-----------------------------------|-----------------------------------|-------------------------------------|----------|-----------------------------------|-----------------------------------|-----------------------------------|
| Female SBA                         | X                                 | NA                                | NA                                | NA                                  | Male SBA | X                                 | NA                                | NA                                |
|                                    | <b>0.637<math>\pm</math>0.009</b> | NA                                | NA                                | NA                                  |          | <b>0.707<math>\pm</math>0.047</b> | NA                                | NA                                |
| Female AFR                         | NA                                | <b>0.625<math>\pm</math>0.080</b> | 0.188 $\pm$ 0.099*                | 0.999 <sup>NE*</sup>                | Male AFR | NA                                | <b>0.456<math>\pm</math>0.208</b> | 0.315 $\pm$ 0.235*                |
|                                    | NA                                | X                                 | NA                                | NA                                  |          | NA                                | X                                 | NA                                |
| Female L                           | NA                                | 0.137                             | <b>0.849<math>\pm</math>0.089</b> | <b>0.484<math>\pm</math>0.172*</b>  | Male L   | NA                                | 0.19                              | <b>0.804<math>\pm</math>0.145</b> |
|                                    | NA                                | NA                                | X                                 | NA                                  |          | NA                                | NA                                | X                                 |
| Female ABS                         | NA                                | 0.164                             | <b>0.0924</b>                     | <b>0.0429<math>\pm</math>0.0115</b> | Male ABS | NA                                | 0.0723                            | 0.0647                            |
|                                    | NA                                | NA                                | NA                                | <b>0.721<math>\pm</math>0.017</b>   |          | NA                                | NA                                | <b>0.648<math>\pm</math>0.023</b> |

  

| <b>Maternal</b> | Female SBA                          | Female AFR                        | Male SBA                            |
|-----------------|-------------------------------------|-----------------------------------|-------------------------------------|
| Female SBA      | <b>0.0740<math>\pm</math>0.0330</b> | -0.0359 $\pm$ 0.326               | <b>0.835<math>\pm</math>0.362</b>   |
| Female AFR      | -0.00313                            | <b>0.103<math>\pm</math>0.042</b> | <u>0.285<math>\pm</math>0.328</u>   |
| Male SBA        | <b>0.0542</b>                       | <u>0.0218</u>                     | <b>0.0570<math>\pm</math>0.0282</b> |

  

| <b>Year of birth</b> | Female SBA                          | Female AFR                          | Male SBA                            |
|----------------------|-------------------------------------|-------------------------------------|-------------------------------------|
| Female SBA           | <b>0.0729<math>\pm</math>0.0252</b> | 0.353 $\pm$ 0.250                   | <b>0.956<math>\pm</math>0.083</b>   |
| Female AFR           | 0.0263                              | <b>0.0765<math>\pm</math>0.0312</b> | <u>0.386<math>\pm</math>0.235</u>   |
| Male SBA             | <b>0.0808</b>                       | 0.0334                              | <b>0.0980<math>\pm</math>0.0314</b> |

  

| <b>Year of measurement</b> | Female SBA |
|----------------------------|------------|
|                            |            |

---

|            |        |
|------------|--------|
| Female SBA | 0.0291 |
|------------|--------|

---

Bold values are significantly different from 0 ( $P < 0.05$ ), X term not fitted: see methods for details. *NA* covariance or correlation not applicable. <sup>NE</sup>Standard errors not estimable. \*covariance is between PE for ABS and residual for other traits (see Methods).
