# Supplementary material for: A Multivariate Analysis of Genetic Constraints to Life History Evolution in a Wild Population of Red Deer
Source: PubMed Central journal article supplement (PMC4256783; doi:10.1534/genetics.114.164319), 2014-10-02
Supplement: 9f125227053518bb65bc83804732ddfb_genetics.114.164319-10.pdf [file 9f125227053518bb65bc83804732ddfb_genetics.114.164319-10.pdf]

**Table S7 Principal components analysis (PCA) of  $\hat{\mathbf{G}}$  estimated from the maximal FA model possible for a) female and b) male and c) both-sex genetic variance-covariance matrices.** Eigenvalues indicate the variance explained by each eigenvector and the eigenvectors indicate the loadings of each trait onto each eigenvalue. The number of axes of variation (non-zero eigenvalues) is limited by the number of factors describing  $\hat{\mathbf{G}}$  (i.e. four for females and both-sexes and two for males (SI Table S4, above)). PC decomposition of reduced rank  $\hat{\mathbf{G}}$  was achieved by converting the elements of  $\hat{\mathbf{\Lambda}}$  into  $\hat{\mathbf{G}}$  using equation (3) and then running a PC analysis on  $\hat{\mathbf{G}}$ . fSBA refers to female SBA, mSBA to male SBA etc..

| a) PCA of fourth order FA estimate of $\mathbf{G}_f$    |         |         |        |         |
|---------------------------------------------------------|---------|---------|--------|---------|
|                                                         | PC1     | PC2     | PC3    | PC4     |
| Eigenvalues                                             | 0.230   | 0.176   | 0.0338 | 0.00446 |
| % variance                                              | 51.8    | 39.6    | 7.6    | 1.0     |
| Eigenvectors                                            |         |         |        |         |
| fSBA                                                    | 0.220   | 0.930   | -0.202 | 0.216   |
| fAFR                                                    | 0.823   | -0.0150 | 0.423  | -0.379  |
| fL                                                      | -0.391  | 0.255   | 0.876  | 0.119   |
| fABS                                                    | 0.349   | -0.265  | 0.112  | 0.892   |
| b) PCA of second order FA estimate of $\mathbf{G}_m$    |         |         |        |         |
|                                                         | PC1     | PC2     |        |         |
| Eigenvalues                                             | 0.680   | 0.214   |        |         |
| % variance                                              | 76.1    | 23.9    |        |         |
| Eigenvectors                                            |         |         |        |         |
| mSBA                                                    | 0.0551  | -0.413  |        |         |
| mAFR                                                    | 0.952   | 0.209   |        |         |
| mL                                                      | 0.107   | -0.830  |        |         |
| mABS                                                    | 0.281   | -0.310  |        |         |
| c) PCA of fourth order FA estimate of $\mathbf{G}_{bs}$ |         |         |        |         |
|                                                         | PC1     | PC2     | PC3    | PC4     |
| Eigenvalues                                             | 0.787   | 0.267   | 0.248  | 0.143   |
| % variance                                              | 54.5    | 18.5    | 17.1   | 9.9     |
| Eigenvectors                                            |         |         |        |         |
| fSBA                                                    | -0.0668 | 0.483   | -0.531 | 0.601   |
| fAFR                                                    | -0.0826 | 0.705   | 0.0376 | -0.445  |
| fL                                                      | 0.310   | -0.0988 | -0.178 | 0.0718  |
| fABS                                                    | -0.0744 | 0.207   | 0.0988 | -0.444  |
| mSBA                                                    | 0.0851  | 0.203   | -0.412 | -0.217  |
| mAFR                                                    | 0.886   | 0.206   | 0.269  | 0.0828  |
| mL                                                      | 0.188   | -0.367  | 0.614  | -0.411  |
| mABS                                                    | 0.244   | 0.0188  | -0.235 | -0.121  |
