# Supplementary material for: A Multivariate Analysis of Genetic Constraints to Life History Evolution in a Wild Population of Red Deer
Source: PubMed Central journal article supplement (PMC4256783; doi:10.1534/genetics.114.164319), 2014-10-02
Supplement: 97c27c54b81c7ea734ce580d0db74792_genetics.114.164319-7.pdf [file 97c27c54b81c7ea734ce580d0db74792_genetics.114.164319-7.pdf]

**Table S5 Female (co)variance components.** Within-sex variances (diagonal) covariances (lower off diagonal) and correlations (upper off diagonal) between female life history traits ( $\pm 1SE$ ) from a multivariate model of all female traits simultaneously. Genetic parameters do not have associated significances or standard errors as they are calculated from a fourth order FA model where significance values and errors are given on factor estimates, not on the subsequently recovered  $\hat{G}$  (see Table S8 for the non-FA estimate of  $G_f$  with associated errors on each element). Non-genetic matrices were estimated as variance-correlation matrices as these models proved more stable than unstructured variance-covariance models (Gilmour *et al.* 2009) and thus there are no standard errors on covariances. The permanent env/residual section of the table presents permanent environment (PE) variances in the upper row and residual variances in the lower row. AFR is multiplied by -1 to make any trade-offs negative in sign. Variances are presented for comparison with univariate models.

|                                    | SBA                            | AFR                            | L                              | ABS                                         |
|------------------------------------|--------------------------------|--------------------------------|--------------------------------|---------------------------------------------|
| <b>Genetic</b>                     |                                |                                |                                |                                             |
| SBA                                | 0.165                          | 0.220                          | 0.147                          | -0.300                                      |
| AFR                                | 0.0360                         | 0.163                          | -0.574                         | 0.787                                       |
| L                                  | 0.0161                         | -0.0624                        | 0.0727                         | -0.696                                      |
| ABS                                | -0.0257                        | 0.0669                         | -0.0396                        | 0.0444                                      |
| <b>Permanent env/<br/>Residual</b> |                                |                                |                                |                                             |
| SBA                                | <i>X</i><br><i>0.660±0.057</i> | <i>NA</i><br><i>NA</i>         | <i>NA</i><br><i>NA</i>         | <i>NA</i><br><i>NA</i>                      |
| AFR                                | <i>NA</i><br><i>NA</i>         | <b>0.624±0.083</b><br><i>X</i> | 0.206±.0110*<br><i>NA</i>      | <b>0.999<sup>NE*</sup></b><br><i>NA</i>     |
| L                                  | <i>NA</i><br><i>NA</i>         | 0.152<br><i>NA</i>             | <b>0.867±0.121</b><br><i>X</i> | <b>0.504±0.172*</b><br><i>NA</i>            |
| ABS                                | <i>NA</i><br><i>NA</i>         | <b>0.168</b><br><i>NA</i>      | <b>0.0997</b><br><i>NA</i>     | <b>0.0452±0.0123</b><br><b>0.720±0.0171</b> |
| <b>Birth year</b>                  |                                |                                |                                |                                             |
| SBA                                | <b>0.0634±0.0228</b>           | 0.381±0.249                    | <i>NA</i>                      | <i>NA</i>                                   |
| AFR                                | 0.0270                         | <b>0.0792±0.0322</b>           | <i>NA</i>                      | <i>NA</i>                                   |
| L                                  | <i>NA</i>                      | <i>NA</i>                      | <i>X</i>                       | <i>NA</i>                                   |
| ABS                                | <i>NA</i>                      | <i>NA</i>                      | <i>NA</i>                      | <i>X</i>                                    |
| <b>Maternal</b>                    |                                |                                |                                |                                             |
| SBA                                | <b>0.0689±0.0333</b>           | 0.0145±0.360                   | <i>NA</i>                      | <i>NA</i>                                   |
| AFR                                | 0.0123                         | <b>0.105±0.043</b>             | <i>NA</i>                      | <i>NA</i>                                   |
| L                                  | <i>NA</i>                      | <i>NA</i>                      | <i>X</i>                       | <i>NA</i>                                   |
| ABS                                | <i>NA</i>                      | <i>NA</i>                      | <i>NA</i>                      | <i>X</i>                                    |
| <b>Year of measurement</b>         |                                |                                |                                |                                             |
| SBA                                | <i>X</i>                       | <i>NA</i>                      | <i>NA</i>                      | <i>NA</i>                                   |
| AFR                                | <i>NA</i>                      | <i>X</i>                       | <i>NA</i>                      | <i>NA</i>                                   |
| L                                  | <i>NA</i>                      | <i>NA</i>                      | <i>X</i>                       | <i>NA</i>                                   |
| ABS                                | <i>NA</i>                      | <i>NA</i>                      | <i>NA</i>                      | <b>0.0293±0.0090</b>                        |

Bold values are significantly different from 0 ( $P < 0.05$ ). *X* term not fit, see methods for details. *NA* covariance or correlation not applicable. \*covariance is between PE for ABS and residual for other traits, estimated by forcing residual variance into permanent environment variance as detailed in the methods. <sup>NE</sup>Standard errors not estimable.
