# Supplementary material for: A Multivariate Analysis of Genetic Constraints to Life History Evolution in a Wild Population of Red Deer
Source: PubMed Central journal article supplement (PMC4256783; doi:10.1534/genetics.114.164319), 2014-10-02
Supplement: f52f1099324af3c428257000d6a4c7d4_genetics.114.164319-8.pdf [file f52f1099324af3c428257000d6a4c7d4_genetics.114.164319-8.pdf]

**Table S4 FA models of a) female, b) male and c) both-sex G-matrices.** The base model contains all fixed effects detailed in the methods, any significant non-genetic random effects (see Table S1) and their associated covariances. Subsequent models describe the log-likelihood of sequential addition of genetic factors (i.e. increasing numbers of elements of  $\Lambda$ , with  $\Psi$  fixed at zero; see Methods). Significance of additional factors is assessed by comparing the change in log-likelihood between models, assuming twice the difference in log-likelihood is  $\chi^2$  distributed with the number of degrees of freedom equal to the difference in the number of parameters between the models ( $\Delta$ df). Models highlighted in italics are the statistically best supported models. % variance is the total genetic variance in any given model divided by the best estimate of the total variance in the  $\mathbf{G}$ -matrix under consideration: for  $\mathbf{G}_f$ , this is the total variance in the fourth order FA model; for  $\mathbf{G}_m$ , this is the sum of the univariate estimates of additive genetic variance for each trait; and for the both-sex model, this is the sum of these two values.

a) FA models of  $\mathbf{G}_f$

| Number of factors | Log likelihood | $\Delta$ df | P-value       | % variance |
|-------------------|----------------|-------------|---------------|------------|
| Base              | -2365.75       |             |               |            |
| 1                 | -2352.07       | 4           | <0.001        | 47%        |
| 2                 | -2348.14       | 3           | <i>0.0490</i> | <i>90%</i> |
| 3                 | -2348.03       | 2           | 0.896         | 93%        |
| 4                 | -2348.01       | 1           | 0.841         | 100%       |

b) FA models of  $\mathbf{G}_m$

|      |                |   |        |      |
|------|----------------|---|--------|------|
| Base | -1462.10       |   |        |      |
| 1    | -1449.49       | 4 | <0.001 | 50%  |
| 2    | -1446.25       | 3 | 0.090  | 114% |
| 3    | no convergence |   |        |      |

c) FA models of  $\mathbf{G}_{bs}$

|      |                |   |               |            |
|------|----------------|---|---------------|------------|
| Base | -3813.39       |   |               |            |
| 1    | -3790.77       | 8 | <0.001        | 43%        |
| 2    | -3782.36       | 7 | <i>0.0186</i> | <i>55%</i> |
| 3    | -3776.89       | 6 | 0.090         | 85%        |
| 4    | -3773.51       | 5 | 0.239         | 118%       |
| 5    | no convergence |   |               |            |
